# Supplementary material for: Sympathetic Denervation Alters the Inflammatory Response of Resident Muscularis Macrophages upon Surgical Trauma and Ameliorates Postoperative Ileus in Mice
Source: MDPI journal article supplement (doi:10.3390/ijms22136872), 2021-06-26
Supplement: s1 [file s1]

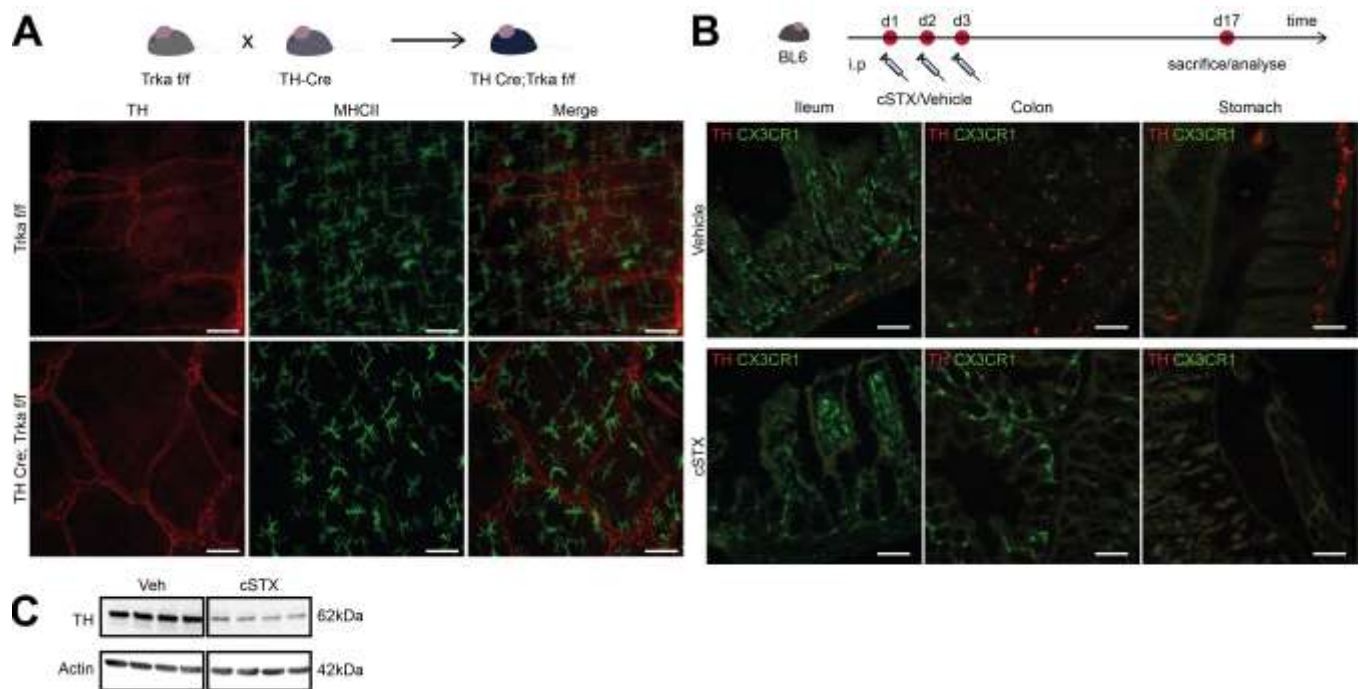

**Supplemental figure S1:** Analysis of the different sympathectomy models. (A) The experimental setting for the genetic (gSTX) model. TH immunofluorescence of ileal muscularis externa whole-mounts from TH-Cre;TrkAf/f mutant mice showed no difference in TH expression as compared to the control TrkAf/f mice. Scale bars, 100µm. (B) Representative histological sections of cSTX-treated ileum (bottom left), terminal colon (bottom middle), and stomach (bottom right) showing profound loss of TH<sup>+</sup> sympathetic neurons as compared to vehicle-treated ileum (top left), terminal colon (top middle), and stomach (top right). Scale bars, 100µm. (C) Representative western blot image showing a reduction in TH protein bands in cSTX-treated mice compared to vehicle-treated mice.

Supplementary table S1: Primer sequences used for qPCR analysis.

|                  |                                                       |       |                                              |
|------------------|-------------------------------------------------------|-------|----------------------------------------------|
| Arg1             | TTGGGTGGATGCTCACACTG<br>TTGCCCATGCAGATTCCC            | Adr1a | TTGAAATTCGGGAAGAAGGA<br>GAGAAGAAAGCCGCCAAGAC |
| CD163            | GTGCTGGATCTCCTGGTTGT<br>CGTTAGTGACAGCAGAGGCA          | Adr1b | AGGCAGCTGTTGAAGTAGCC<br>TCTTCATCGCTCTCCCACTT |
| YM1              | TCTCTACTCCTCAGAACCGTAAGA<br>GATGTTTGTCTTAGGAGGGCTTC   | Adr1d | ATTGAAGTAGCCCAGCCAGA<br>GCTGGTTCCCTTTTTCTTC  |
| IL6              | AAGTCGGAGGCTTAATTACACATGT<br>CCATTGCACAACTCTTTTCTCATT | Adr2a | TCTGGTCGTTGATCTTGCAG<br>CATCTCGGCTGTCATCTCCT |
| IL1b             | TTGACGGACCCCAAAAGATG<br>CAGGACAGCCCAGGTCAAAG          | Adr2b | CAAAGCCTTTCATCTCCCTG<br>CTGGCCTCGACCTACTAAG  |
| TNFa             | CTGAAC TTCGGGGTGATCGG<br>GGCTTG TCACTCGAATTTTGAGA     | Gapdh | GGGAAGCCCATCACCATCTT<br>GCCTCACCCCATTTGATGTT |
| Fizz1/<br>Retnla | SYBR green assay (<br>QT00254359)                     | AdrB1 | AAGTCCAGAGCTCGCAGAAG<br>GCTGATCTGGTCATGGGATT |
| iNOS             | AGGCCACATCGGATTTCACTTGCAA<br>(Taqman assay)           | AdrB2 | TAGCGATCCACTGCAATCAC<br>ATTTTGGCAACTTCTGGTGC |
| CSF1R            | CTCTGCTGGTGCTACTGCTG<br>TTGCCTTCGTATCTCTCGATG         | AdrB3 | GGGGAAGGTAGAAGGAGACG<br>ACAGGAATGCCACTCCAATC |
| BMP2             | AGACCACCGGCTGGAGAG<br>TTTTCCCACTCATCTCTGGAA           | IL10  | GATGCCCCAGGCAGAGAA<br>CAGGAGGGAATTCAAATGC    |
| TH               | AATGGGTTCACAGGTTC<br>AGCAGGATACCAAGCAGGC              |       |                                              |
